# Supplementary material for: Dehydroeffusol inhibits hypoxia-induced epithelial–mesenchymal transition in non-small cell lung cancer cells through the inactivation of Wnt/β-catenin pathway
Source: PubMed Central journal article supplement (PMC7256677; doi:10.1042/bsr20194284), 2020-05-28
Supplement: BSR-2019-4284_supp.pdf [file BSR-2019-4284_supp.pdf]

**A**

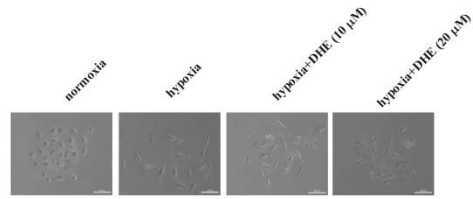

**B**

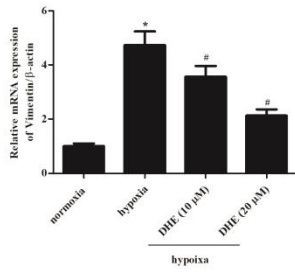

**C**

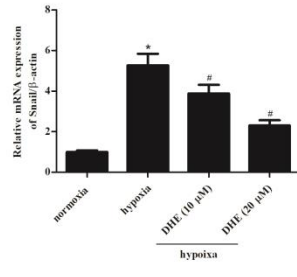

**D**

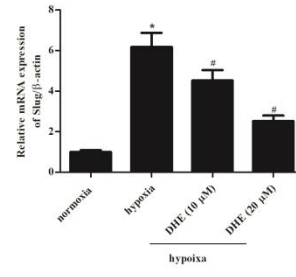

**Supplementary Figure 1. DHE inhibited the mRNA expression levels of vimentin, snail and slug in NSCLC cells exposed to hypoxia.** Untreated A549 cells under hypoxia condition and A549 cells treated with 10 & 20  $\mu$ M of DHE for 24 h under hypoxic condition. (A) The cellular morphology of A549 cells. (B-D) qRT-PCR analysis was performed to detect the mRNA expression levels of vimentin, snail and slug. \* $p < 0.05$ .vs. A549 cells under normoxiccondition. # $p < 0.05$ .vs. A549 cells under hypoxic condition.
